# Supplementary material for: High-performance light trajectory tracking and image sensing devices based on a γ-In2Se3/GaAs heterostructure
Source: Royal Society of Chemistry journal article supplement (doi:10.1039/d0tc03872e), 2020-01-01
Supplement: d0tc03872e1.pdf [file d0tc03872e1.pdf]

## Supporting Information

### High-performance light trajectory tracking and image sensing devices based on $\gamma$ - $\text{In}_2\text{Se}_3/\text{GaAs}$ heterostructure

Jing-Wei Kang, Chao Zhang, Kai-Jun Cao, Yu Lu, Chun-Yan Wu,\* Shi-Rong Chen, Di Wu, Chao Xie,\* Lin-Bao Luo\*

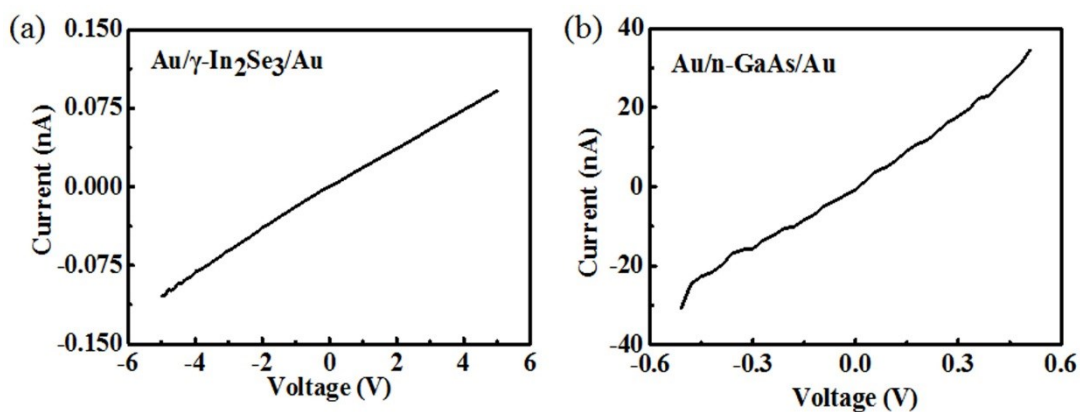

**Fig. S1**  $I$ - $V$  curves of (a)  $\text{Au}/\gamma\text{-In}_2\text{Se}_3/\text{Au}$  and (b)  $\text{Au}/\text{n-GaAs}/\text{Au}$  in dark.

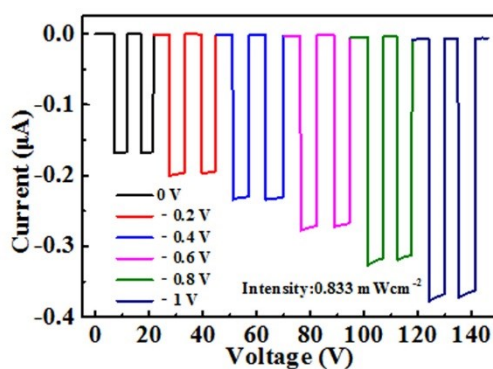

**Fig. S2** Time-dependent photoresponse of the  $\gamma\text{-In}_2\text{Se}_3/\text{GaAs}$  heterojunction photodetector under 660 nm light illumination ( $0.833 \text{ mWcm}^{-2}$ ) at different bias voltages of 0, -0.2, -0.4, -0.6, -0.8 and -1 V, respectively.

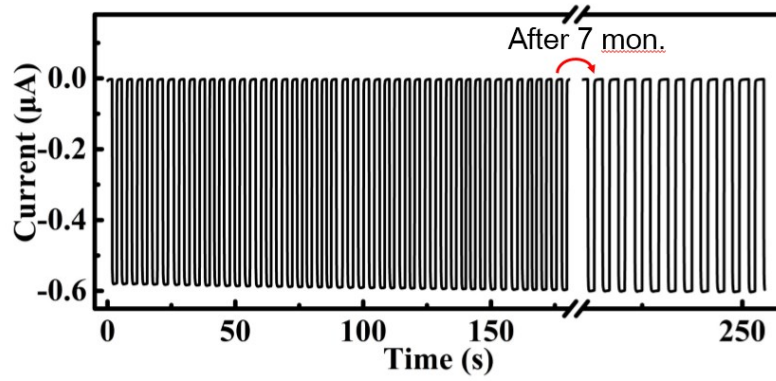

**Fig. S3** Photoresponse of the  $\gamma$ - $\text{In}_2\text{Se}_3/\text{GaAs}$  heterojunction photodetector for 45 times and after 7-month storage under ambient conditions.

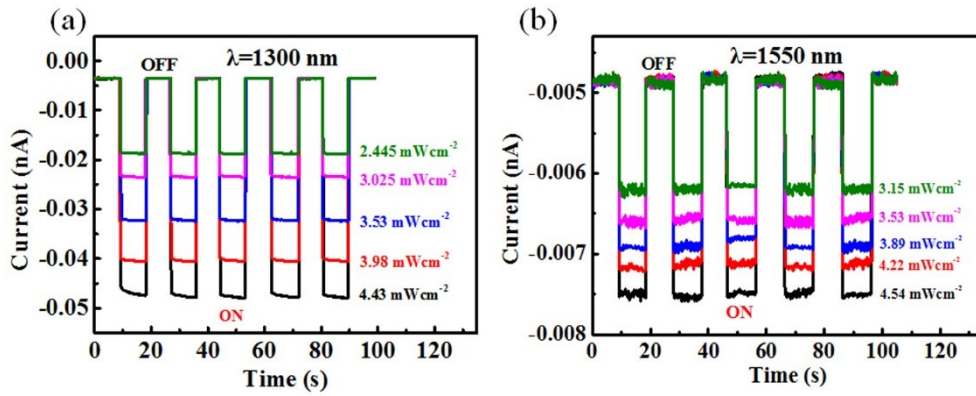

**Fig. S4** Photoresponse of the  $\gamma$ - $\text{In}_2\text{Se}_3/\text{GaAs}$  heterojunction photodetector under (a) 1300 nm and (b) 1550 nm, respectively.

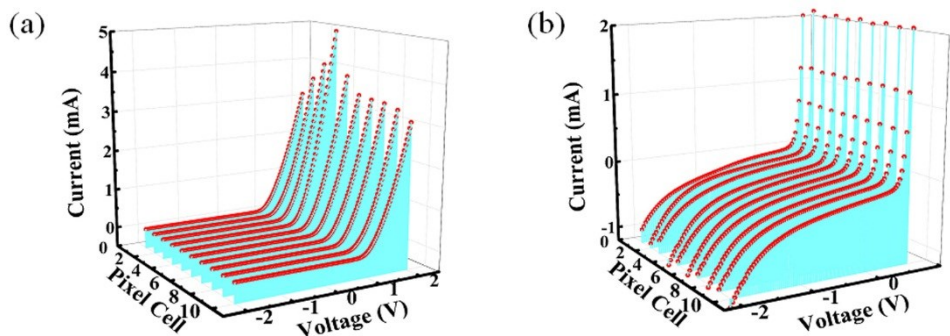

**Fig. S5** (a) A 3D diagram shows the  $I$ - $V$  curves for each pixel device in dark. (b)  $I$ - $V$  curves of each pixel device under 660 nm illumination ( $0.85 \text{ mWcm}^{-2}$ ).
